# Supplementary material for: Conductive and Thermo-Responsive Composite Hydrogels with Poly(N-isopropylacrylamide) and Carbon Nanotubes Fabricated by Two-Step Photopolymerization
Source: MDPI journal article supplement (doi:10.3390/polym15041022), 2023-02-18
Supplement: s1 [file s1]

## Supplementary Materials

### Conductive and Thermo-Responsive Composite Hydrogels with Poly(N-Isopropylacrylamide) and Carbon Nanotubes Fabricated by Two-Step Photopolymerization

Gianluca Ciarleglio, Elisa Toto and Maria Gabriella Santonicola\*

*Department of Chemical Engineering Materials Environment, Sapienza University of Rome, Via del Castro Laurenziano 7, 00161 Rome, Italy*

\*Correspondence: mariagabriella.santonicola@uniroma1.it; Tel.: +39-06-49766372

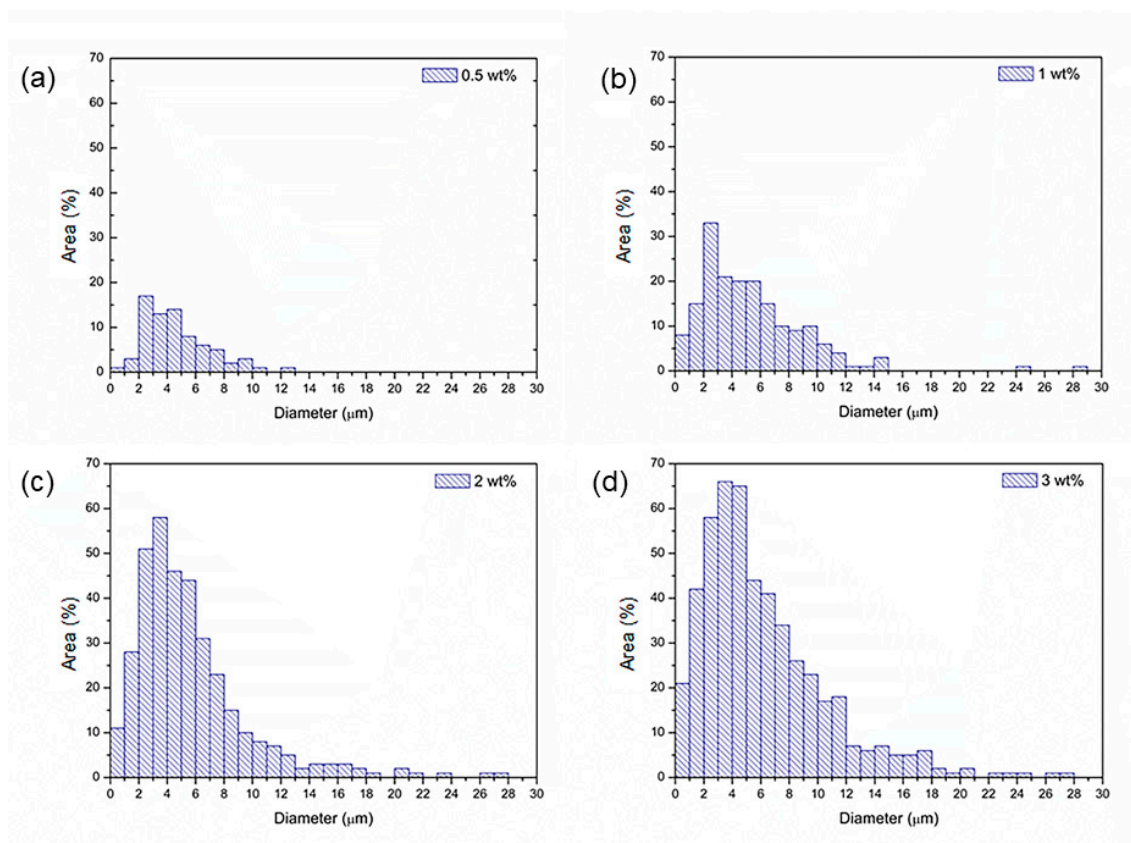

**Figure S1.** Particle size distribution of MWCNT-COOH aggregates after dispersion in the PNIPAM gel obtained by the first photopolymerization. Concentration of nanotubes equal to (a) 0.5 wt%, (b) 1.0 wt%, (c) 2.0 wt%, (d) 3.0 wt%.

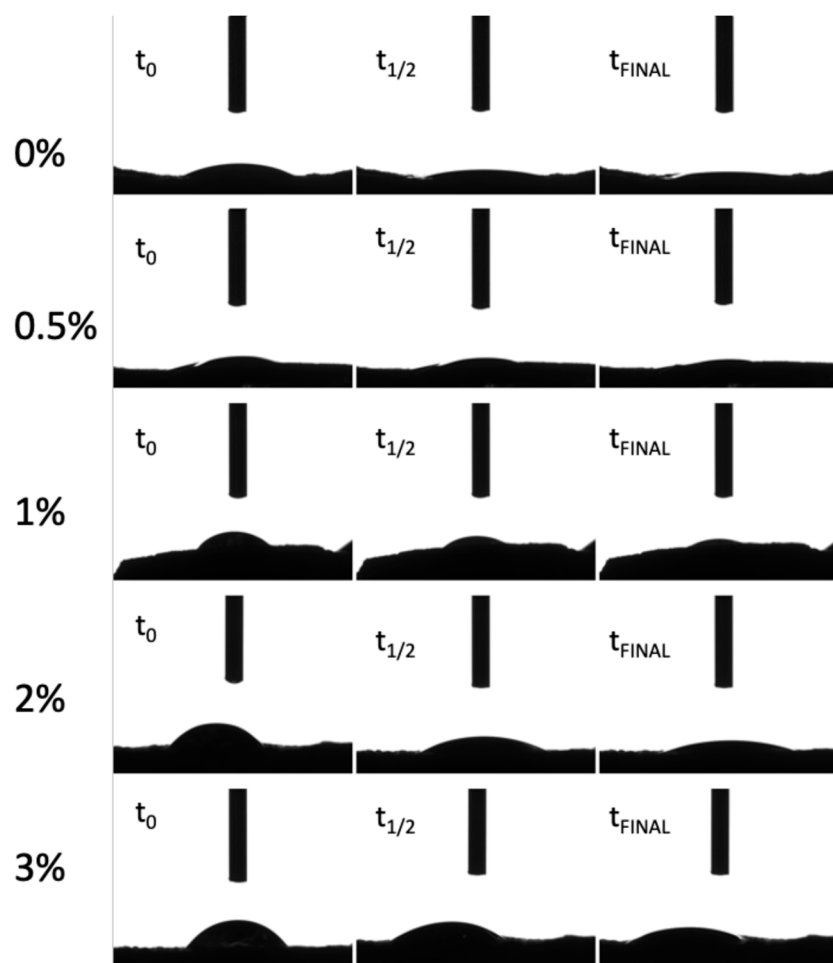

**Figure S2.** Contact angle analysis at 3 different time frames for pure PNIPAM hydrogel and PNIPAM/MWCNT-COOH composites with different nanotube concentrations (0.5, 1, 2, and 3 wt%).

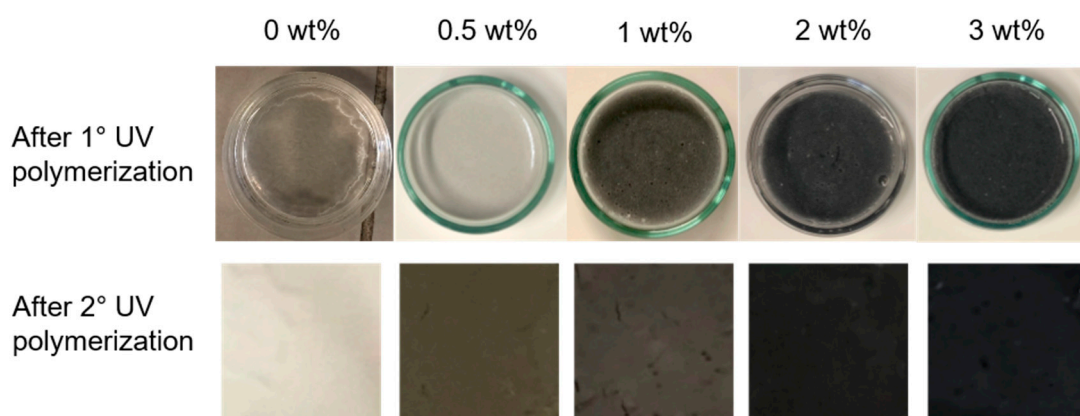

**Figure S3.** Images of PNIPAM and PNIPAM/MWCNT-COOH composite hydrogels during the two-step photopolymerization process. Top: PNIPAM/MWCNT-COOH gels after dispersion of the nanotubes in the PNIPAM gel. Bottom: top surface of the final hydrogels after the second step of photopolymerization and purification in water.

**Table S1.** Mean particle size of MWCNT-COOH aggregates after dispersion in the PNIPAM gel obtained by the first photopolymerization.

| MWCNT-COOH (wt%) | Mean Particle Size ( $\mu\text{m}$ ) |
|------------------|--------------------------------------|
| 0.5              | $4.58 \pm 2.24$                      |
| 1                | $5.15 \pm 3.13$                      |
| 2                | $5.43 \pm 3.62$                      |
| 3                | $5.96 \pm 3.92$                      |

**Table S2.** Mean values of the parameters of the equivalent circuit (Figure 11a) used for fitting the electrical impedance data of hydrogels in water.

| MWCNT-COOH (wt%) | $R_1$<br>[ $\Omega$ ]                    | $R_2$<br>[ $\Omega$ ]                 | $Y_{01}$<br>[ $\alpha \times \Omega^{-1} \times \text{s}^{\alpha}$ ] | $\alpha_{01}$                               | $W_d$<br>[ $n \times \Omega^{-1} \times \text{s}^{0.5}$ ] | Goodness of Fit                             |
|------------------|------------------------------------------|---------------------------------------|----------------------------------------------------------------------|---------------------------------------------|-----------------------------------------------------------|---------------------------------------------|
| 1                | $2.1 \times 10^2 \pm 9.1$                | $1.7 \times 10^4 \pm 2.9 \times 10^3$ | $5.0 \times 10^{-6} \pm 4.2 \times 10^{-7}$                          | $6.8 \times 10^{-1} \pm 7.3 \times 10^{-3}$ | $5.1 \times 10^{-5} \pm 9.1 \times 10^{-6}$               | $1.4 \times 10^{-2} \pm 2.4 \times 10^{-4}$ |
| 2                | $1.5 \times 10^2 \pm 3.3$                | $1.4 \times 10^4 \pm 1.5 \times 10^3$ | $1.5 \times 10^{-5} \pm 1.4 \times 10^{-6}$                          | $6.0 \times 10^{-1} \pm 9.5 \times 10^{-3}$ | $1.5 \times 10^{-4} \pm 1.8 \times 10^{-5}$               | $1.0 \times 10^{-2} \pm 5.6 \times 10^{-4}$ |
| 3                | $3.5 \times 10^1 \pm 7.9 \times 10^{-1}$ | $4.6 \times 10^3 \pm 4.6 \times 10^2$ | $6.1 \times 10^{-5} \pm 7.3 \times 10^{-6}$                          | $6.2 \times 10^{-1} \pm 9.8 \times 10^{-3}$ | $4.9 \times 10^{-4} \pm 1.7 \times 10^{-4}$               | $9.6 \times 10^{-3} \pm 6.8 \times 10^{-4}$ |

| MWCNT-COOH<br>(wt%) | $Y_{01}$<br>[ $\alpha \times \Omega^{-1} \times s^a$ ] | $\alpha_{01}$                                | $Y_{02}$<br>[ $\alpha \times \Omega^{-1} \times s^a$ ] | $\alpha_{02}$                               |
|---------------------|--------------------------------------------------------|----------------------------------------------|--------------------------------------------------------|---------------------------------------------|
| 1                   | $5.8 \times 10^{-10} \pm 1.1 \times 10^{-10}$          | $8.3 \times 10^{-1} \pm 1.2 \times 10^{-1}$  | $9.0 \times 10^{-7} \pm 9.1 \times 10^{-8}$            | $6.9 \times 10^{-1} \pm 1.9 \times 10^{-2}$ |
| 2                   | $2.7 \times 10^{-7} \pm 1.3 \times 10^{-7}$            | $3.2 \times 10^{-1} \pm 1.1 \times 10^{-1}$  | $1.5 \times 10^{-6} \pm 4.9 \times 10^{-7}$            | $5.8 \times 10^{-1} \pm 2.0 \times 10^{-1}$ |
| 3                   | $6.1 \times 10^{-9} \pm 5.6 \times 10^{-10}$           | $6.18 \times 10^{-1} \pm 1.3 \times 10^{-1}$ | $2.5 \times 10^{-6} \pm 4.9 \times 10^{-7}$            | $6.7 \times 10^{-1} \pm 2.3 \times 10^{-2}$ |

**Table S3.** Mean values of the parameters of the equivalent circuit (Figure 11b) used for fitting the electrical impedance data of hydrogels in PBS.

| MWCNT-COOH<br>(wt%) | R1<br>[ $\Omega$ ]                    | R2<br>[ $\Omega$ ]                    | R3<br>[ $\Omega$ ]                    | Wd<br>[ $n \times \Omega^{-1} \times s^{0.5}$ ] | Goodness of Fit                            |
|---------------------|---------------------------------------|---------------------------------------|---------------------------------------|-------------------------------------------------|--------------------------------------------|
| 1                   | $4.9 \times 10^3 \pm 3.2 \times 10^3$ | $2.0 \times 10^4 \pm 5.9 \times 10^3$ | $8.6 \times 10^4 \pm 3.5 \times 10^3$ | $6.6 \times 10^{-5} \pm 1.3 \times 10^{-5}$     | $5.1 \cdot 10^{-4} \pm 6.2 \times 10^{-5}$ |
| 2                   | $5.2 \times 10^2 \pm 6.0 \times 10$   | $1.8 \times 10^4 \pm 5.5 \times 10^3$ | $7.9 \times 10^4 \pm 2.7 \times 10^4$ | $2.8 \times 10^{-5} \pm 9.2 \times 10^{-6}$     | $9.1 \cdot 10^{-3} \pm 6.2 \times 10^{-4}$ |
| 3                   | $6.5 \times 10^2 \pm 1.3 \times 10^3$ | $1.1 \times 10^4 \pm 2.6 \times 10^3$ | $3.5 \times 10^4 \pm 2.5 \times 10^3$ | $8.8 \times 10^{-5} \pm 7.4 \times 10^{-5}$     | $1.3 \cdot 10^{-3} \pm 6.2 \times 10^{-4}$ |
